# Supplementary material
Source: publisher site journal article supplement (https://www.dovepress.com/article/229270)
Supplement: Supplementary file 1 [file get_supplementary_file.php]

Supplementary figure 1

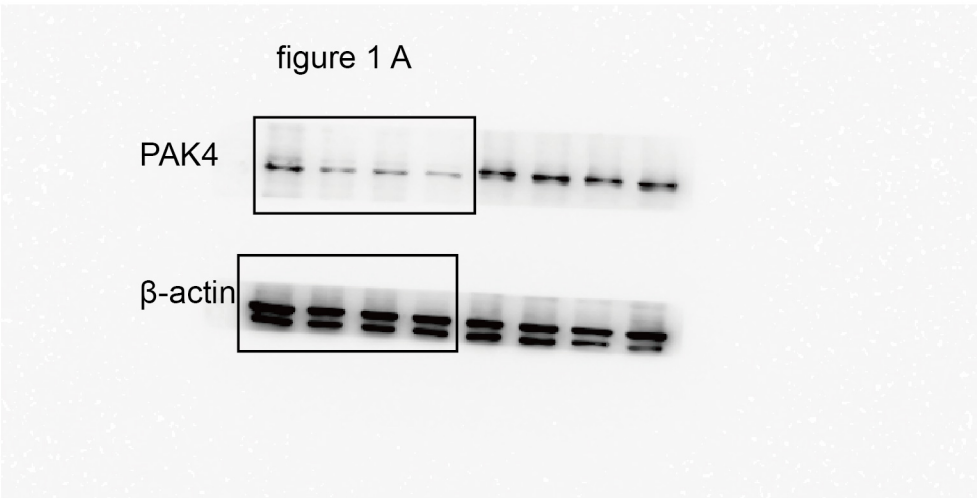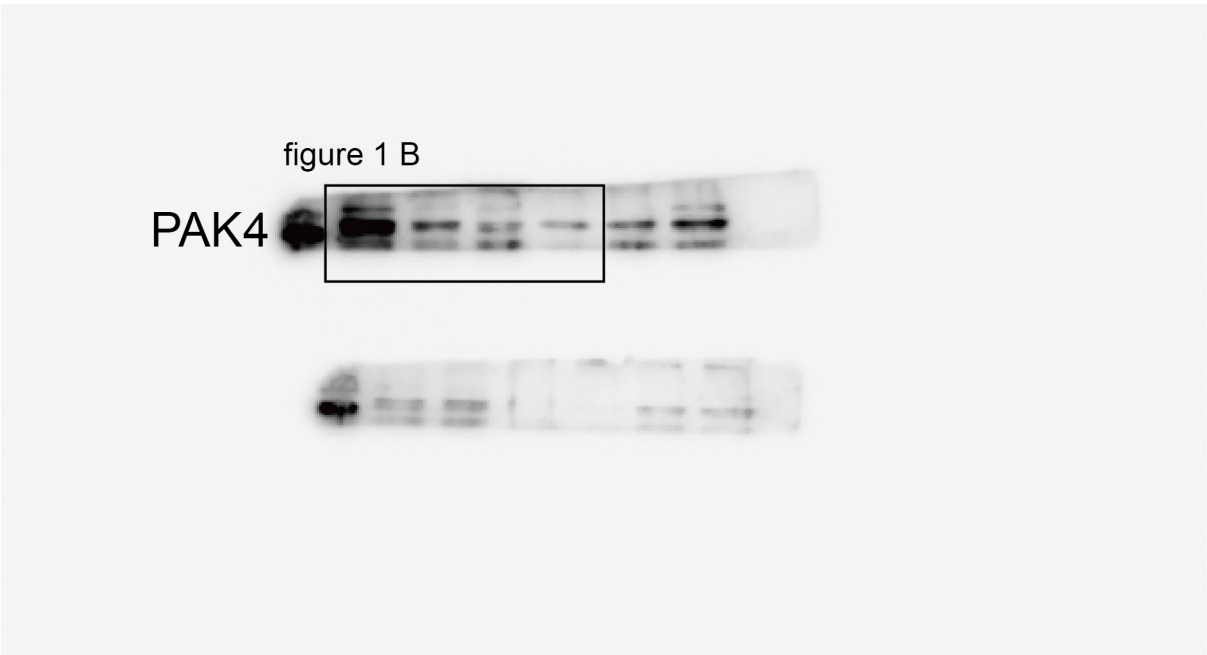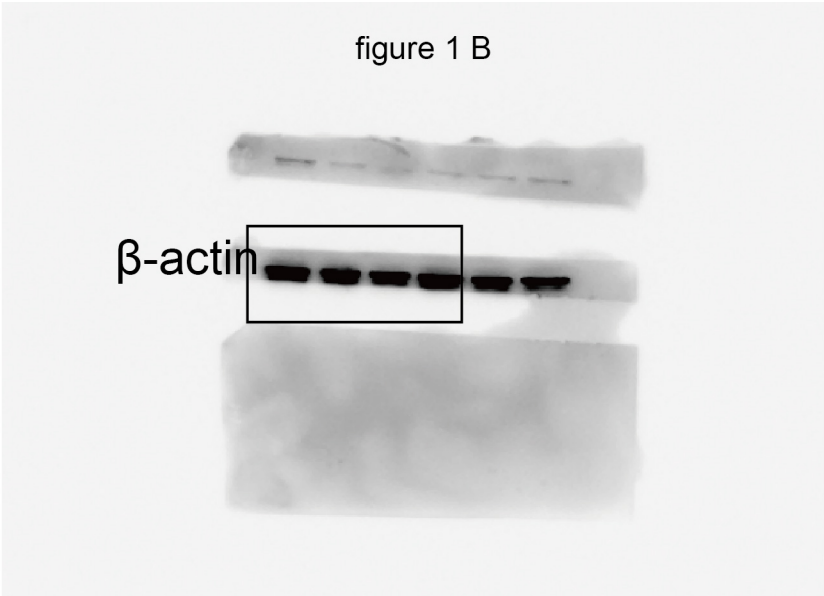

## Supplementary figure 2

SCC9-PAK4-Lv cells

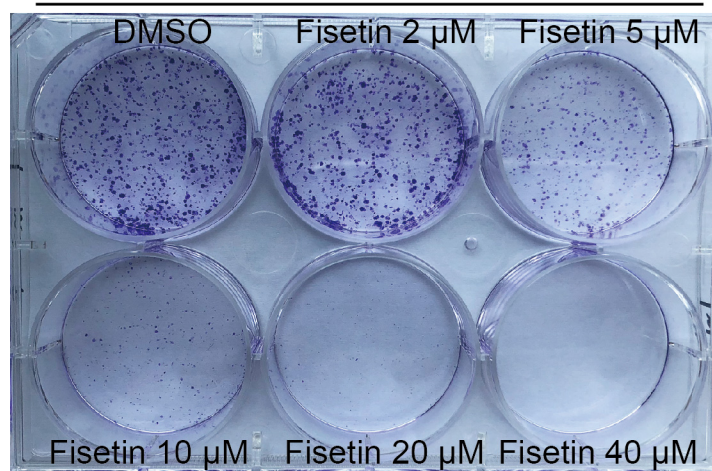

SCC4-PAK4-Lv cells

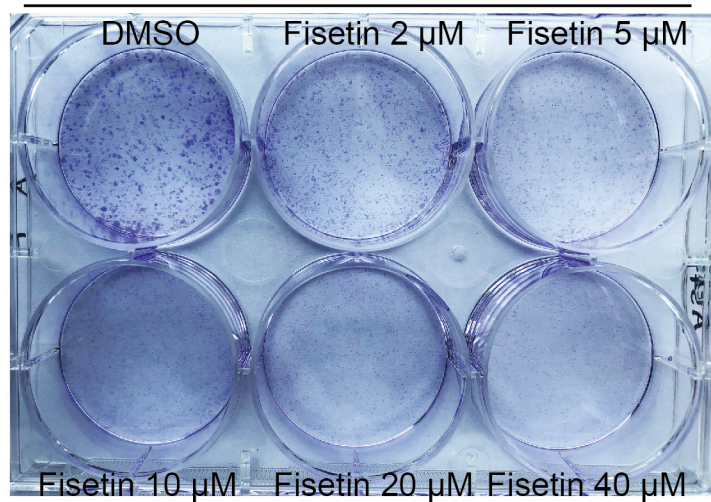

Tca8113-PAK4-Lv cells

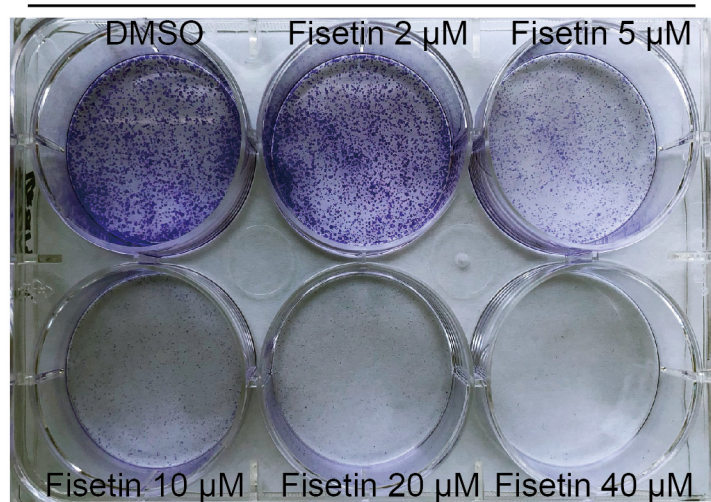

Supplementary figure 3

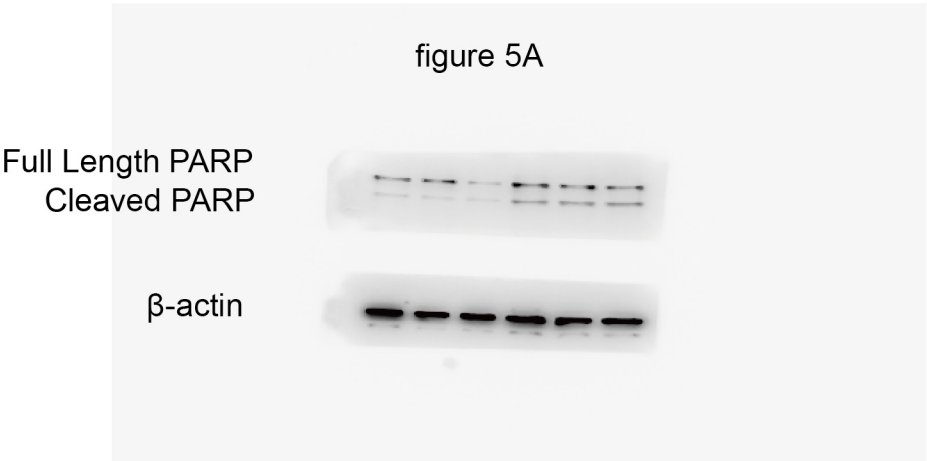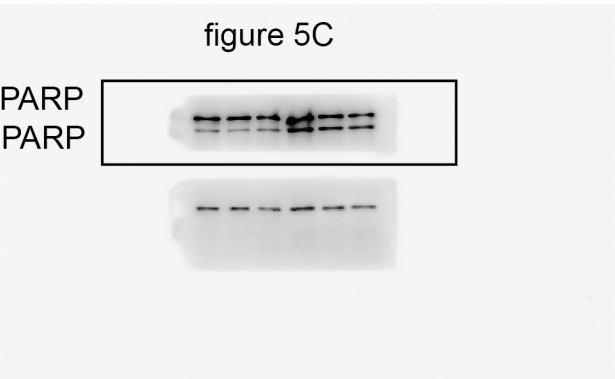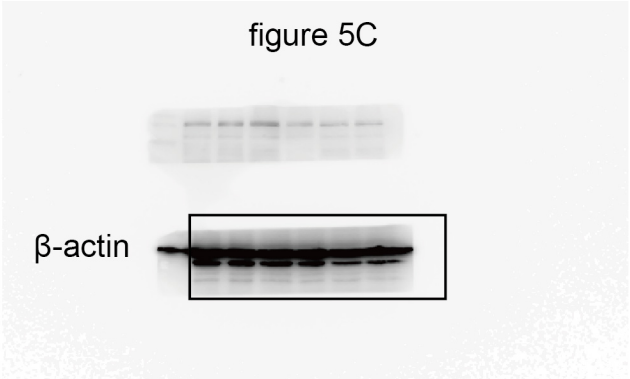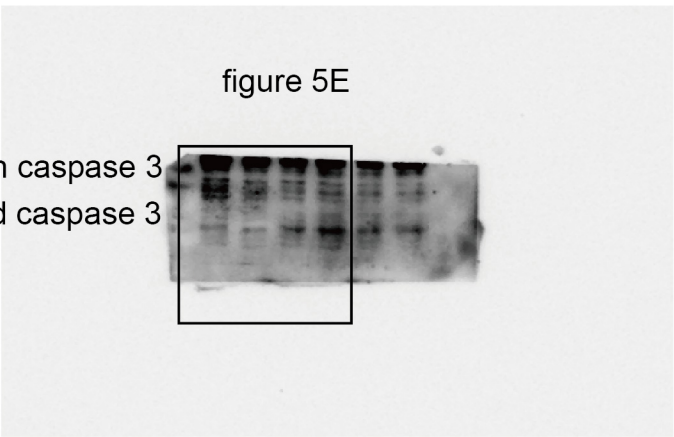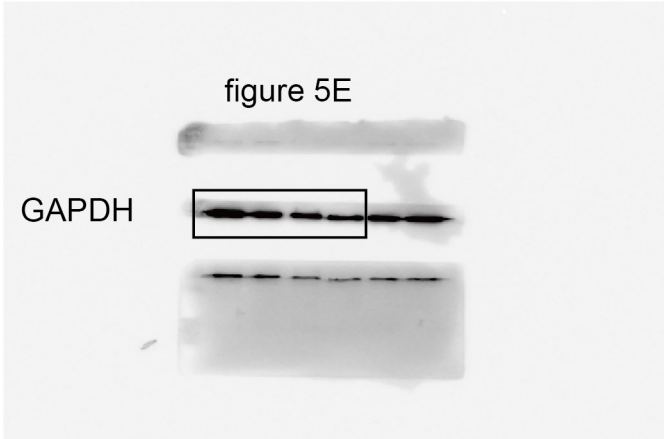

## Legends of supplementary

### Supplementary figure 1

Fisetin reduced PAK4 protein expression in SCC9 cells and SCC4 cells

### Supplementary figure 2

Fisetin inhibits the proliferation of PAK4-overexpression OSCC cells

### Supplementary figure 3

Effect of fisetin treatment on cleavage of caspases 3 and PARP in PAK4-overexpression OSCC cells
